# Supplementary material
Source: PubMed Central journal article supplement (PMC3867268)
Supplement: NIHMS504056-supplement-1.pdf [file NIHMS504056-supplement-1.pdf]

## Supplemental Material

**Supplementary Figure 1A-D.** Distribution of Log Transformed Markers 25(OH)D(A), 1,25(OH)<sub>2</sub>D(B), FGF23(C), and PTH(D) Across the 1,431 Participants in CRIC

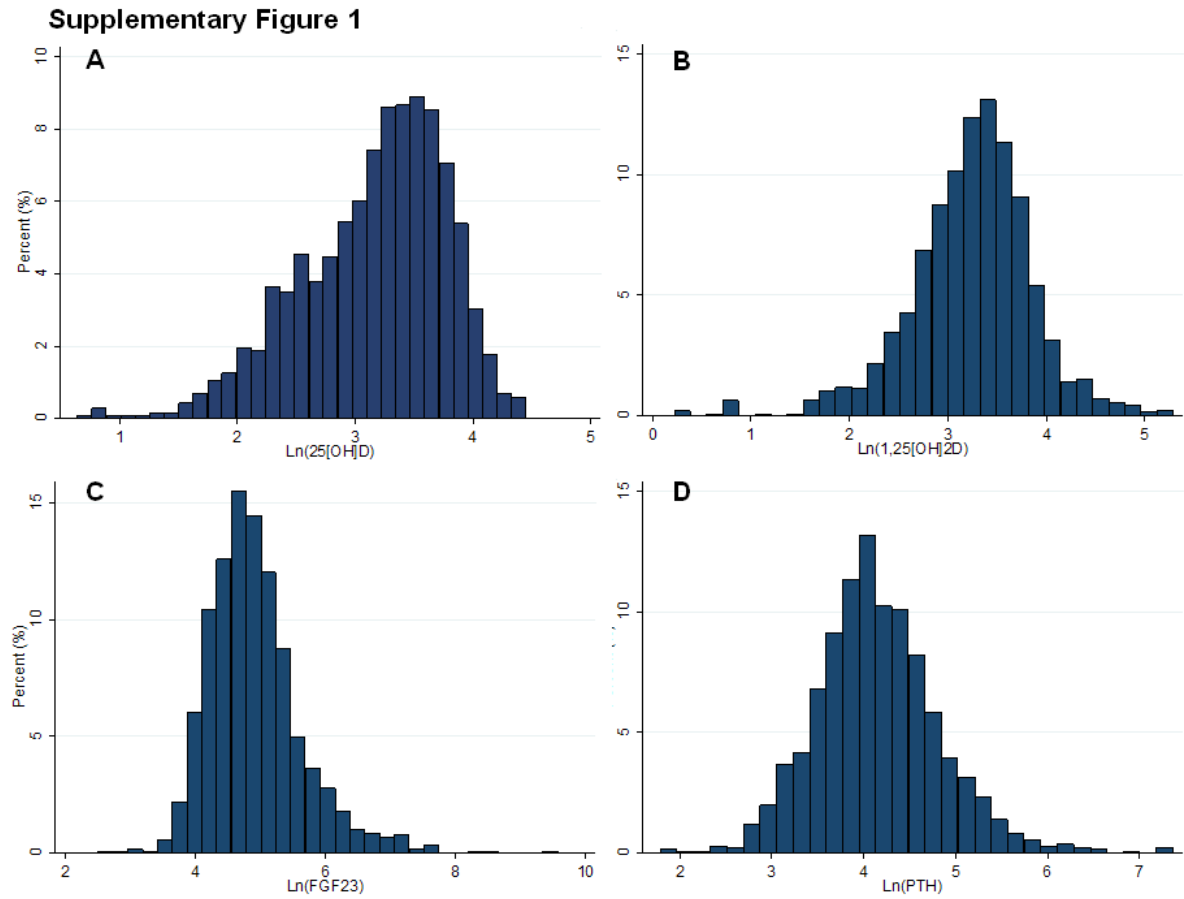

**Supplementary Table 1. Correlation Coefficients Across Vitamin D and Related Metabolites\***

|                              | <b>1,25(OH)<sub>2</sub>D</b> | <b>PTH</b> | <b>FGF23</b> |
|------------------------------|------------------------------|------------|--------------|
| <b>25(OH)D</b>               | 0.36                         | -0.39      | -0.18        |
| <b>1,25(OH)<sub>2</sub>D</b> |                              | -0.21      | -0.28        |
| <b>PTH</b>                   |                              |            | 0.35         |

\*all p<0.001
